# Supplementary material for: Environmental Inequality and Residential Sorting in Germany: A Spatial Time-Series Analysis of the Demographic Consequences of Industrial Sites
Source: Oxford University Press journal article supplement (doi:10.1215/00703370-9563077), 2021-10-18
Supplement: ruttenauer_esm.pdf [file ruttenauer_esm.pdf]

# Supplementary Material

## Environmental Inequality and Residential Sorting in Germany: A Spatial Time-Series Analysis on the Demographic Consequences of Industrial Sites

### Supplement S1. Descriptives

**Table S1.1.** Summary statistics

|                              | West   |          | East   |          | Overall |          |
|------------------------------|--------|----------|--------|----------|---------|----------|
|                              | Mean   | SD       | Mean   | SD       | Mean    | SD       |
| Number industrial facilities | 1.29   | (3.39)   | 1.3    | (3.7)    | 1.29    | (3.46)   |
| Relative rank                | 3.88   | (2.1)    | 3.89   | (2.17)   | 3.88    | (2.12)   |
| Income tax revenue           | 409.39 | (142.29) | 198.83 | (69.01)  | 363.59  | (156.28) |
| Trade tax revenue            | 403.02 | (717.14) | 252.9  | (425.95) | 370.37  | (667.62) |
| Percent foreigners (proxy)   | 13.55  | (9.13)   | 2.24   | (2.69)   | 11.09   | (9.41)   |
| Percent 65 and older         | 20.39  | (3.05)   | 23.9   | (3.44)   | 21.16   | (3.46)   |
| Percent 18 and younger       | 17.45  | (1.91)   | 14.06  | (1.73)   | 16.71   | (2.34)   |
| Population density           | 307.14 | (394.7)  | 178.2  | (271.75) | 279.1   | (375.22) |
| N.Obs.                       | 34860  |          | 9690   |          | 44550   |          |

## Supplement S2. Rank event time function

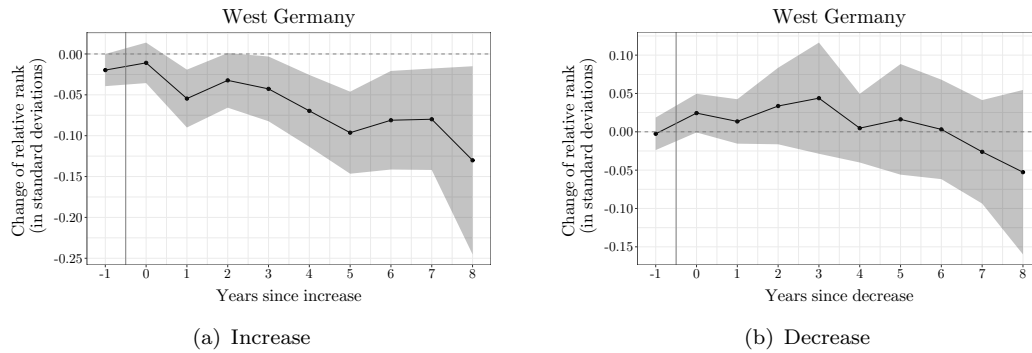

**Figure S2.1.** Effect estimates of rank reordering ( $\geq |1|$  rank) and time paths in West Germany based on FEIS estimate with cluster robust 95% confidence intervals.

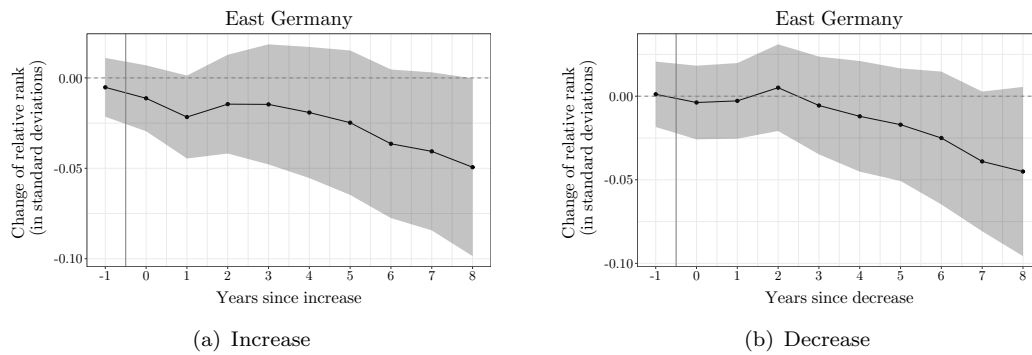

**Figure S2.2.** Effect estimates of rank reordering ( $\geq |1|$  rank) and time paths in East Germany based on FEIS estimate with cluster robust 95% confidence intervals.

## Supplement S3. Conventional Fixed Effects models

**Table S3.2.** Fixed effects (FE) estimator. Dep. var.: Number of industrial facilities

|                               | Overall            | West              | East                           |
|-------------------------------|--------------------|-------------------|--------------------------------|
|                               | (1)                | (2)               | (3)                            |
| Income tax revenue $_{t-1}$   | -0.017*<br>(0.007) | -0.009<br>(0.007) | -0.045 <sup>†</sup><br>(0.027) |
| W Income tax revenue $_{t-1}$ | 0.028**<br>(0.010) | 0.015<br>(0.010)  | 0.132*<br>(0.059)              |
| Controls                      | Yes                | Yes               | Yes                            |
| R <sup>2</sup>                | 0.021              | 0.018             | 0.039                          |
| Adj. R <sup>2</sup>           | -0.103             | -0.105            | -0.085                         |
| Num. obs.                     | 40095              | 31374             | 8721                           |

\*\*\* $p < 0.001$ , \*\* $p < 0.01$ , \* $p < 0.05$ , <sup>†</sup> $p < 0.1$ . Standardized coefficients. Cluster robust standard errors in parentheses. W is the spatially lagged coefficient. Controls: % aged 18 or younger, % aged 65 or above, population density, population density<sup>2</sup>, % of foreigners, trade tax revenue per capita, trade tax revenue per capita<sup>2</sup>, year dummies (except year, all additionally included as spatial lag).

**Table S3.3.** Fixed effects (FE) estimator. Dep. var.: Income tax revenue

|                              | Overall              | West                          | East                | Overall           | West              | East              |
|------------------------------|----------------------|-------------------------------|---------------------|-------------------|-------------------|-------------------|
|                              | (1)                  | (2)                           | (3)                 | (4)               | (5)               | (6)               |
| Number facilities $_{t-1}$   | -0.115***<br>(0.033) | -0.166***<br>(0.044)          | 0.006<br>(0.014)    |                   |                   |                   |
| W Number facilities $_{t-1}$ | 0.228**<br>(0.087)   | 0.230 <sup>†</sup><br>(0.139) | 0.239***<br>(0.036) |                   |                   |                   |
| Relative rank $_{t-1}$       |                      |                               |                     | -0.012<br>(0.028) | -0.014<br>(0.038) | -0.005<br>(0.009) |
| Controls                     | Yes                  | Yes                           | Yes                 | Yes               | Yes               | Yes               |
| R <sup>2</sup>               | 0.455                | 0.445                         | 0.954               | 0.451             | 0.443             | 0.944             |
| Adj. R <sup>2</sup>          | 0.386                | 0.376                         | 0.948               | 0.382             | 0.373             | 0.936             |
| Num. obs.                    | 40095                | 31374                         | 8721                | 40095             | 31374             | 8721              |

\*\*\* $p < 0.001$ , \*\* $p < 0.01$ , \* $p < 0.05$ , <sup>†</sup> $p < 0.1$ . Standardized coefficients. Cluster robust standard errors in parentheses. W is the spatially lagged coefficient. Controls: % aged 18 or younger, % aged 65 or above, population density, population density<sup>2</sup>, % of foreigners, trade tax revenue per capita, trade tax revenue per capita<sup>2</sup> year dummies (except year, all additionally included as spatial lag in models 1 - 3).

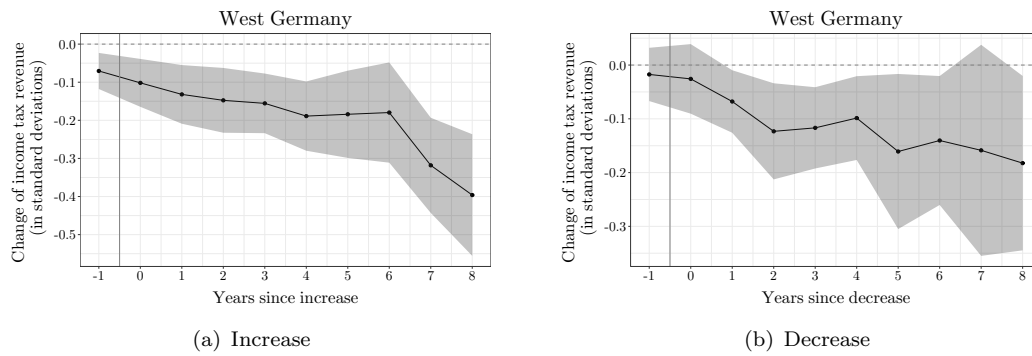

**Figure S3.3.** Effect estimates of dichotomous shocks ( $\geq |0.9|$ ) and time paths in West Germany based on FE SLX estimate with cluster robust 95% confidence intervals.

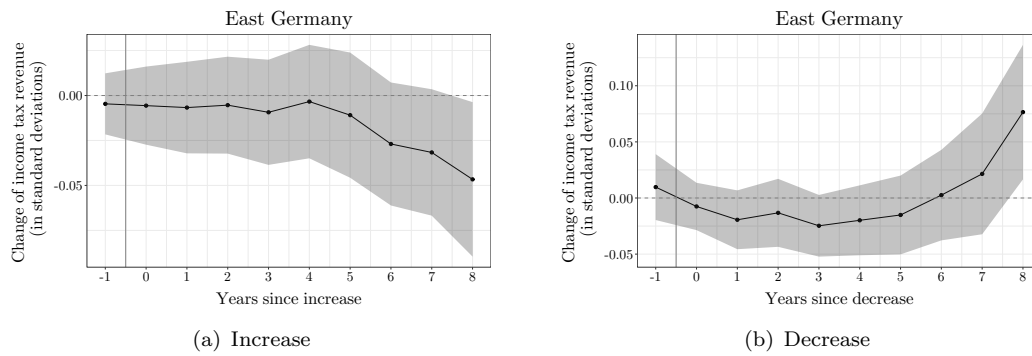

**Figure S3.4.** Effect estimates of dichotomous shocks ( $\geq |0.9|$ ) and time paths in East Germany based on FE SLX estimate with cluster robust 95% confidence intervals.

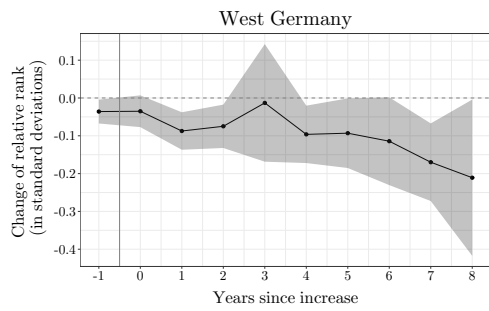

(a) Increase

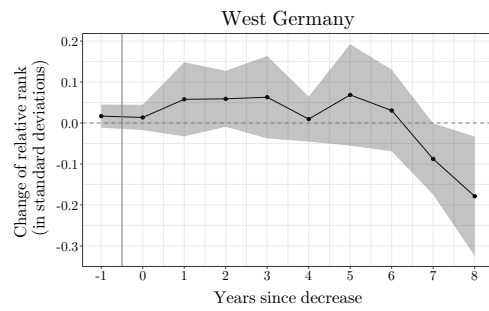

(b) Decrease

**Figure S3.5.** Effect estimates of rank reordering ( $\geq |1|$  rank) and time paths in West Germany based on FEIS estimate with cluster robust 95% confidence intervals.

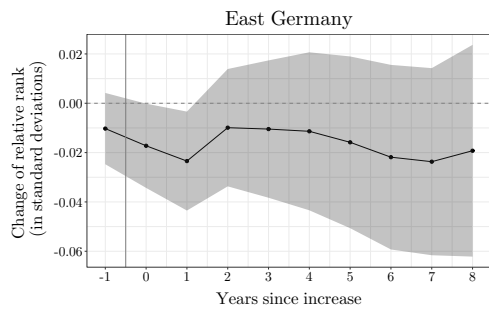

(a) Increase

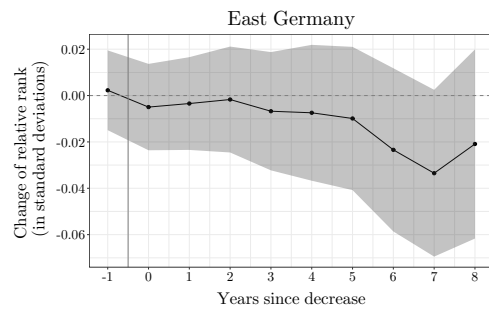

(b) Decrease

**Figure S3.6.** Effect estimates of rank reordering ( $\geq |1|$  rank) and time paths in East Germany based on FEIS estimate with cluster robust 95% confidence intervals.

## Supplement S4. Validation strategy

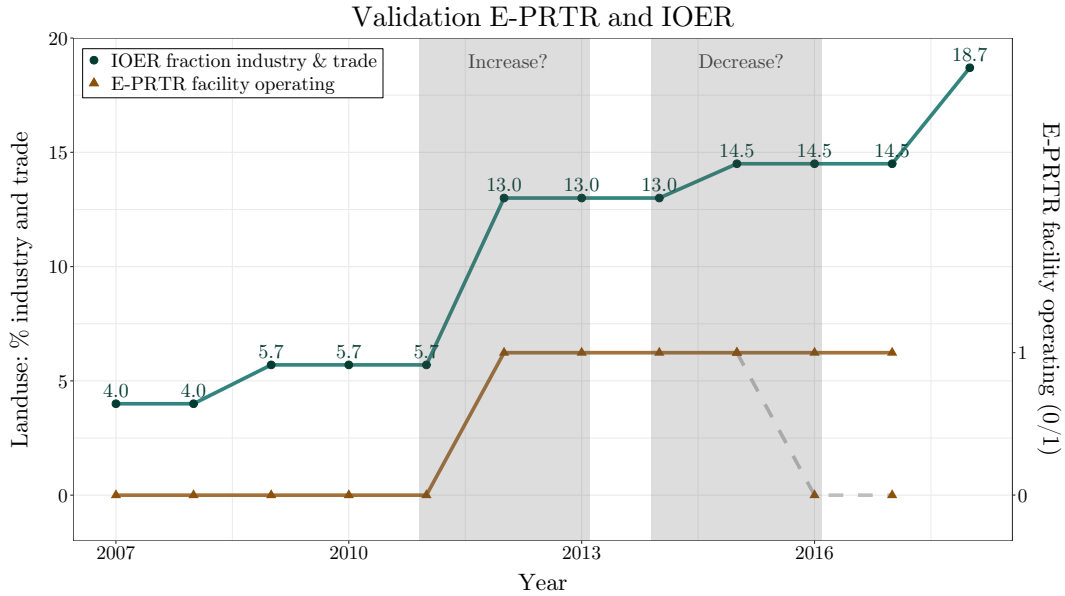

**Figure S4.7.** Example of validation strategy for placement of new and closing of old industrial facilities. Dashed line with triangles shows the raw information on facility operation, the solid line shows the corrected data.

We validate the changes in industrial facilities based on the E-PRTR (European Commission, 2006) against land-use data based on the IOER monitor (Meinel, 2011). For a  $1 \times 1$  km grid over Germany, the IOER monitor provides information on the share of land-use for industry and trade.

For each E-PRTR facility location, we allocated the respective land-use information from 2007 to 2018 based on the geographic coordinates. Subsequently, we evaluated the changes in land-use around the opening or closing of the facility according to E-PRTR. Therefore, we use the respective year as well as the year before and after the indicated year, to allow for potential time lags in the data. For instance, the facility in Figure S4.7 started to operate in 2012 and was closed again in 2015 according to E-PRTR (brown line with triangles). So, we look at the IOER land-use data around these years (marked in grey) and check if industrial land-use increased in 2012 and decreased in 2015. In this example, we find that industrial land-use increased in 2012, thus supporting the operation start in 2012. However, industrial land-use did not decrease around 2015, thus indicating that the facility continued operating even though it dropped from the E-PRTR. We thus assume that the facility was not closed, and correct the data by recoding the operation period from 2012 to 2017 (the end of our operation period). Similarly, we would correct the starting point if not conform to increases in industrial land-use.

## Supplement S5. Results without validation

**Table S5.4.** SLX between estimator. Dep. var.: Number of industrial facilities

|                      | Overall              |                      | West                 |                      | East                |                  |
|----------------------|----------------------|----------------------|----------------------|----------------------|---------------------|------------------|
|                      | (1)                  | (2)                  | (3)                  | (4)                  | (5)                 | (6)              |
| Income tax revenue   | -0.414***<br>(0.052) | -0.183***<br>(0.044) | -0.445***<br>(0.054) | -0.228***<br>(0.046) | -0.100<br>(0.163)   | 0.012<br>(0.125) |
| W Income tax revenue | 0.465***<br>(0.056)  | -0.073<br>(0.051)    | 0.476***<br>(0.061)  | -0.078<br>(0.055)    | 0.727***<br>(0.197) | 0.052<br>(0.160) |
| Controls             | No                   | Yes                  | No                   | Yes                  | No                  | Yes              |
| R <sup>2</sup>       | 0.016                | 0.387                | 0.019                | 0.385                | 0.027               | 0.593            |
| Adj. R <sup>2</sup>  | 0.015                | 0.385                | 0.019                | 0.382                | 0.025               | 0.587            |
| Num. obs.            | 4455                 | 4455                 | 3486                 | 3486                 | 969                 | 969              |

\*\*\* $p < 0.001$ , \*\* $p < 0.01$ , \* $p < 0.05$ , † $p < 0.1$ . Standardized coefficients. Standard errors in parentheses. W is the spatially lagged coefficient. Controls: % aged 18 or younger, % aged 65 or above, population density, population density<sup>2</sup>, % of foreigners, trade tax revenue per capita, trade tax revenue per capita<sup>2</sup> (all additionally included as spatial lag).

**Table S5.5.** Fixed effects individual slopes (FEIS) estimator. Dep. var.: Number of industrial facilities

|                                                  | Overall           | West              | East             |
|--------------------------------------------------|-------------------|-------------------|------------------|
|                                                  | (1)               | (2)               | (3)              |
| Income tax revenue <sub><math>t-1</math></sub>   | -0.008<br>(0.012) | -0.007<br>(0.012) | 0.004<br>(0.053) |
| W Income tax revenue <sub><math>t-1</math></sub> | 0.026<br>(0.016)  | 0.019<br>(0.016)  | 0.131<br>(0.120) |
| Controls                                         | Yes               | Yes               | Yes              |
| R <sup>2</sup>                                   | 0.009             | 0.006             | 0.028            |
| Adj. R <sup>2</sup>                              | 0.009             | 0.006             | 0.026            |
| Num. obs.                                        | 40095             | 31374             | 8721             |
| Num. groups: id                                  | 4455              | 3486              | 969              |

\*\*\* $p < 0.001$ , \*\* $p < 0.01$ , \* $p < 0.05$ , † $p < 0.1$ . Standardized coefficients. Cluster robust standard errors in parentheses. W is the spatially lagged coefficient. Controls: % aged 18 or younger, % aged 65 or above, population density, population density<sup>2</sup>, % of foreigners, year dummies (except year, all additionally included as spatial lag). Slopes for FEIS: trade tax revenue per capita, trade tax revenue per capita<sup>2</sup>.

**Table S5.6.** Fixed effects individual slopes (FEIS) estimator Dep. var.: Income tax revenue

|                                    | Overall           | West               | East                          | Overall                        | West                           | East              |
|------------------------------------|-------------------|--------------------|-------------------------------|--------------------------------|--------------------------------|-------------------|
|                                    | (1)               | (2)                | (3)                           | (4)                            | (5)                            | (6)               |
| Number facilities <sub>t-1</sub>   | -0.011<br>(0.008) | -0.024*<br>(0.012) | 0.010 <sup>†</sup><br>(0.005) |                                |                                |                   |
| W Number facilities <sub>t-1</sub> | 0.048*<br>(0.020) | 0.036<br>(0.030)   | 0.080***<br>(0.018)           |                                |                                |                   |
| Relative rank <sub>t-1</sub>       |                   |                    |                               | -0.008 <sup>†</sup><br>(0.005) | -0.011 <sup>†</sup><br>(0.006) | -0.002<br>(0.004) |
| Controls                           | Yes               | Yes                | Yes                           | Yes                            | Yes                            | Yes               |
| R <sup>2</sup>                     | 0.736             | 0.716              | 0.942                         | 0.729                          | 0.710                          | 0.933             |
| Adj. R <sup>2</sup>                | 0.736             | 0.716              | 0.942                         | 0.728                          | 0.710                          | 0.933             |
| Num. obs.                          | 40095             | 31374              | 8721                          | 40095                          | 31374                          | 8721              |
| Num. groups: id                    | 4455              | 3486               | 969                           | 4455                           | 3486                           | 969               |

\*\*\* $p < 0.001$ , \*\* $p < 0.01$ , \* $p < 0.05$ , <sup>†</sup> $p < 0.1$ . Standardized coefficients. Cluster robust standard errors in parentheses. W is the spatially lagged coefficient. Controls: % aged 18 or younger, % aged 65 or above, population density, population density<sup>2</sup>, % of foreigners, year dummies (except year, all additionally included as spatial lag in models 1 - 3). Slopes for FEIS: trade tax revenue per capita, trade tax revenue per capita<sup>2</sup>.

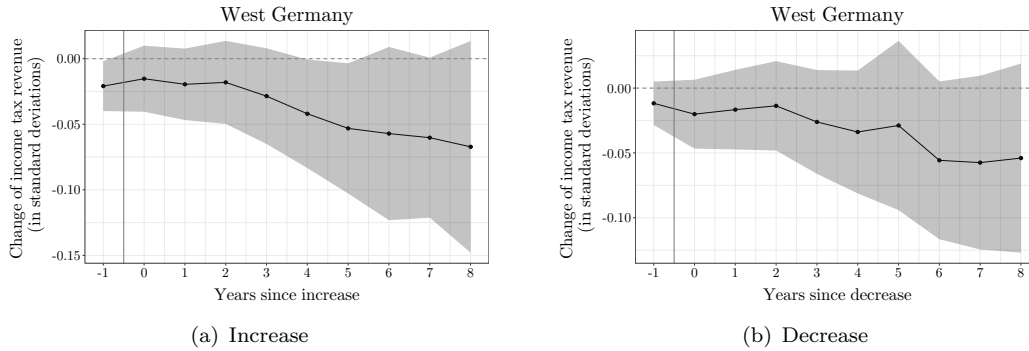**Figure S5.8.** Effect estimates of dichotomous shocks ( $\geq |0.9|$ ) and time paths in West Germany based on FEIS SLX estimate with cluster robust 95% confidence intervals.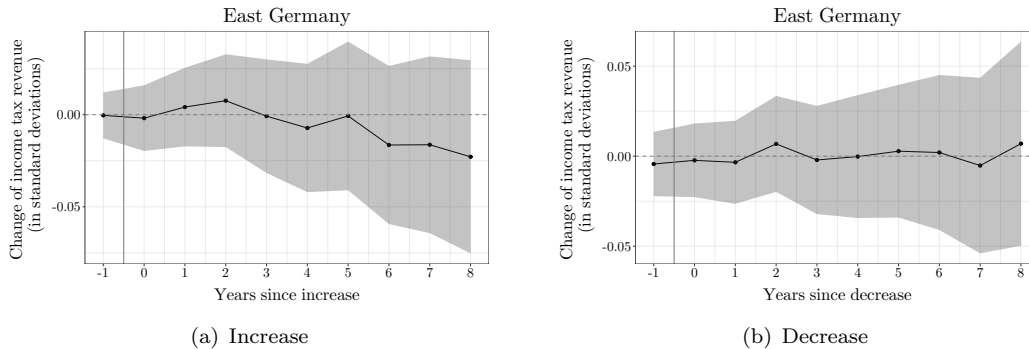**Figure S5.9.** Effect estimates of dichotomous shocks ( $\geq |0.9|$ ) and time paths in East Germany based on FEIS SLX estimate with cluster robust 95% confidence intervals.



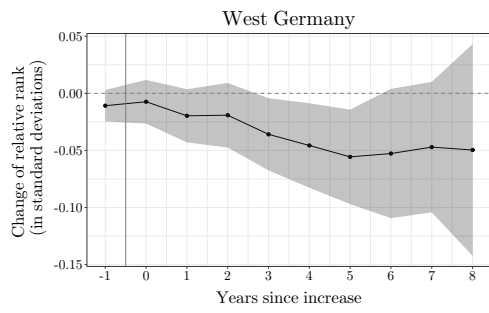

(a) Increase

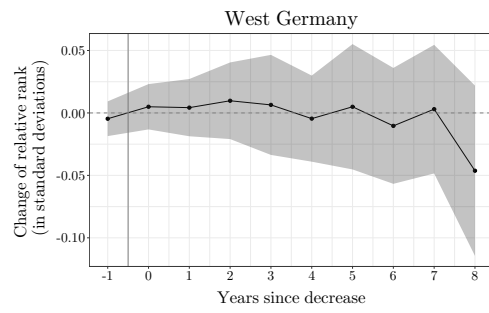

(b) Decrease

**Figure S5.10.** Effect estimates of rank reordering ( $\geq |1|$  rank) and time paths in West Germany based on FEIS estimate with cluster robust 95% confidence intervals.

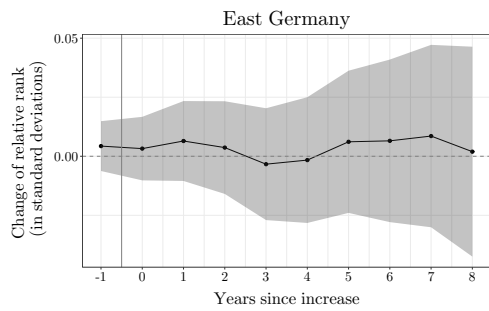

(a) Increase

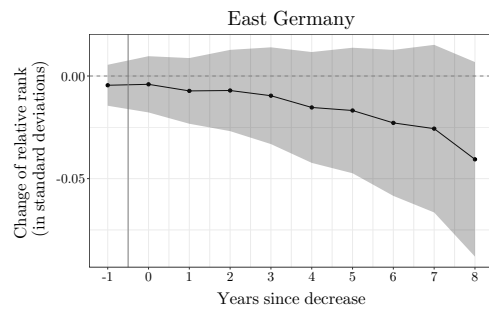

(b) Decrease

**Figure S5.11.** Effect estimates of rank reordering ( $\geq |1|$  rank) and time paths in East Germany based on FEIS estimate with cluster robust 95% confidence intervals.

## Supplement S6. Toxicity weighted air pollution

For the following results, we used the toxicity weighted emissions to air by E-PRTR facilities. For toxicity weighting, we use USETox Endpoint human health characterization factors based on total health risk of emissions to urban air. The final toxic air pollution per km<sup>2</sup> is computed as

$$pollution_i = \left( \sum_{p=1}^P toxweight_p * emissions_p \right) / area_i,$$

for each pollutant  $p$  and municipality  $i$ . As in the main analysis, the emissions of each facility were allocated to the respective municipalities by the proportionate overlap of a 1km buffer around each facility and each municipality's geographic boundaries. For missing emission record within two valid emission records linear interpolation was performed. Note, however, that we cannot impute values for cases in which E-PRTR records are missing from the beginning / to the end of the observation period even though validation with land-use indicated the facility was present. Results are nearly identical without any imputation (not shown).

**Table S6.7.** SLX between estimator. Dep. var.: Toxicity-weighted air pollution

|                      | Overall             |                      | West                 |                      | East              |                   |
|----------------------|---------------------|----------------------|----------------------|----------------------|-------------------|-------------------|
|                      | (1)                 | (2)                  | (3)                  | (4)                  | (5)               | (6)               |
| Income tax revenue   | -0.140**<br>(0.049) | -0.193***<br>(0.052) | -0.149***<br>(0.042) | -0.190***<br>(0.044) | -0.033<br>(0.232) | -0.142<br>(0.273) |
| W Income tax revenue | 0.136*<br>(0.053)   | 0.116†<br>(0.061)    | 0.160***<br>(0.048)  | 0.074<br>(0.052)     | 0.130<br>(0.282)  | 0.331<br>(0.349)  |
| Controls             | No                  | Yes                  | No                   | Yes                  | No                | Yes               |
| R <sup>2</sup>       | 0.002               | 0.023                | 0.004                | 0.041                | 0.000             | 0.031             |
| Adj. R <sup>2</sup>  | 0.001               | 0.020                | 0.003                | 0.036                | -0.002            | 0.015             |
| Num. obs.            | 4455                | 4455                 | 3486                 | 3486                 | 969               | 969               |

\*\*\* $p < 0.001$ , \*\* $p < 0.01$ , \* $p < 0.05$ , † $p < 0.1$ . Standardized coefficients. Standard errors in parentheses. W is the spatially lagged coefficient. Controls: % aged 18 or younger, % aged 65 or above, population density, population density<sup>2</sup>, % of foreigners, trade tax revenue per capita, trade tax revenue per capita<sup>2</sup> (all additionally included as spatial lag).

**Table S6.8.** Fixed effects individual slopes (FEIS) estimator. Dep. var.: Toxicity-weighted air pollution

|                                     | Overall           | West              | East              |
|-------------------------------------|-------------------|-------------------|-------------------|
|                                     | (1)               | (2)               | (3)               |
| Income tax revenue <sub>t-1</sub>   | -0.006<br>(0.041) | -0.007<br>(0.046) | -0.007<br>(0.079) |
| W Income tax revenue <sub>t-1</sub> | 0.010<br>(0.036)  | -0.017<br>(0.034) | 0.218<br>(0.180)  |
| Controls                            | Yes               | Yes               | Yes               |
| R <sup>2</sup>                      | 0.002             | 0.004             | 0.003             |
| Adj. R <sup>2</sup>                 | 0.002             | 0.003             | 0.001             |
| Num. obs.                           | 40095             | 31374             | 8721              |
| Num. groups: id                     | 4455              | 3486              | 969               |

\*\*\* $p < 0.001$ , \*\* $p < 0.01$ , \* $p < 0.05$ , † $p < 0.1$ . Standardized coefficients. Cluster robust standard errors in parentheses. W is the spatially lagged coefficient. Controls: % aged 18 or younger, % aged 65 or above, population density, population density<sup>2</sup>, % of foreigners, year dummies (except year, all additionally included as spatial lag). Slopes for FEIS: trade tax revenue per capita, trade tax revenue per capita<sup>2</sup>.

**Table S6.9.** Fixed effects individual slopes (FEIS) estimator Dep. var.: Income tax revenue

|                                    | Overall          | West              | East             | Overall          | West             | East             |
|------------------------------------|------------------|-------------------|------------------|------------------|------------------|------------------|
|                                    | (1)              | (2)               | (3)              | (4)              | (5)              | (6)              |
| Tox air pollution <sub>t-1</sub>   | 0.000<br>(0.002) | -0.000<br>(0.004) | 0.000<br>(0.001) |                  |                  |                  |
| W Tox air pollution <sub>t-1</sub> | 0.003<br>(0.005) | 0.000<br>(0.011)  | 0.003<br>(0.004) |                  |                  |                  |
| Relative rank <sub>t-1</sub>       |                  |                   |                  | 0.008<br>(0.008) | 0.009<br>(0.009) | 0.009<br>(0.014) |
| Controls                           | Yes              | Yes               | Yes              | Yes              | Yes              | Yes              |
| R <sup>2</sup>                     | 0.736            | 0.716             | 0.941            | 0.729            | 0.710            | 0.933            |
| Adj. R <sup>2</sup>                | 0.736            | 0.716             | 0.941            | 0.728            | 0.710            | 0.933            |
| Num. obs.                          | 40095            | 31374             | 8721             | 40095            | 31374            | 8721             |
| Num. groups: id                    | 4455             | 3486              | 969              | 4455             | 3486             | 969              |

\*\*\* $p < 0.001$ , \*\* $p < 0.01$ , \* $p < 0.05$ , † $p < 0.1$ . Standardized coefficients. Cluster robust standard errors in parentheses. W is the spatially lagged coefficient. Controls: % aged 18 or younger, % aged 65 or above, population density, population density<sup>2</sup>, % of foreigners, year dummies (except year, all additionally included as spatial lag in models 1 - 3). Slopes for FEIS: trade tax revenue per capita, trade tax revenue per capita<sup>2</sup>.

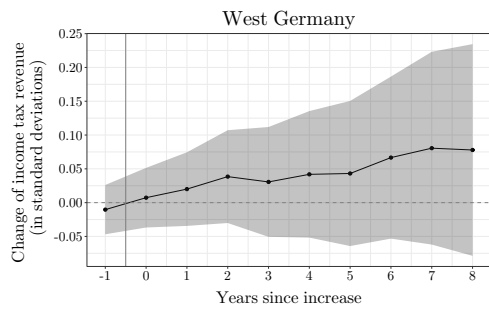

(a) Increase

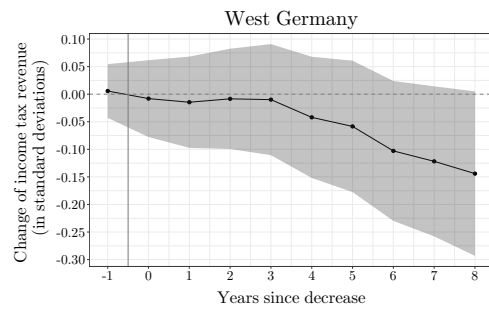

(b) Decrease

**Figure S6.12.** Effect estimates of dichotomous shocks ( $\geq |1SD|$ ) and time paths in West Germany based on FEIS SLX estimate with cluster robust 95% confidence intervals.

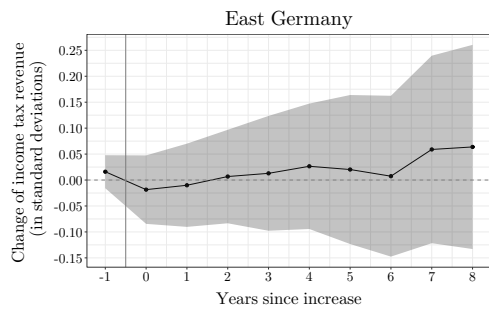

(a) Increase

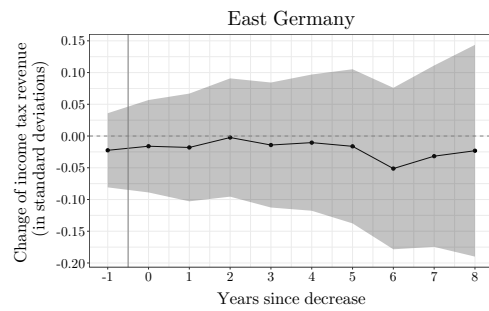

(b) Decrease

**Figure S6.13.** Effect estimates of dichotomous shocks ( $\geq |1SD|$ ) and time paths in East Germany based on FEIS SLX estimate with cluster robust 95% confidence intervals.

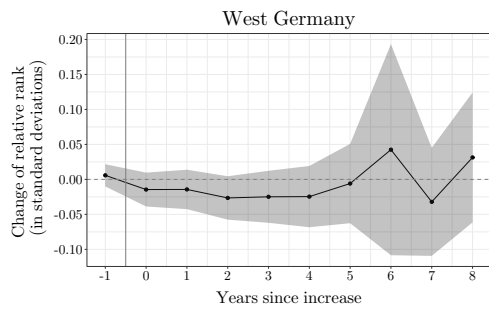

(a) Increase

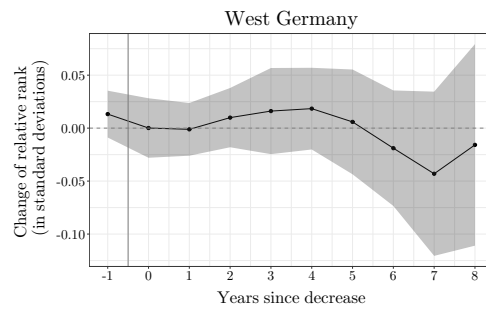

(b) Decrease

**Figure S6.14.** Effect estimates of rank reordering ( $\geq |1|$  rank) and time paths in West Germany based on FEIS estimate with cluster robust 95% confidence intervals.

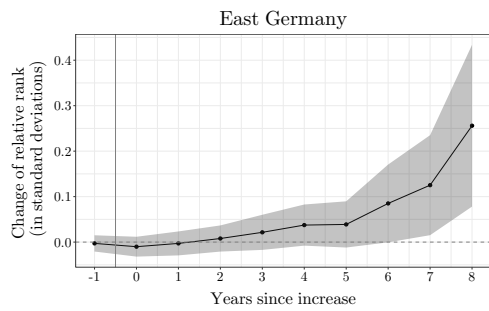

(a) Increase

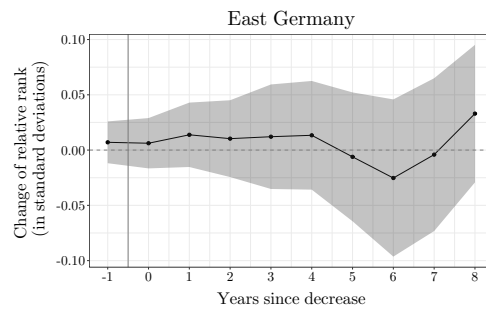

(b) Decrease

**Figure S6.15.** Effect estimates of rank reordering ( $\geq |1|$  rank) and time paths in East Germany based on FEIS estimate with cluster robust 95% confidence intervals.

## Supplement S7. Main results including controls

**Table S7.10.** SLX between estimator. Dep. var.: Number of industrial facilities

|                                   | Overall              |                      | West                 |                                | East                |                               |
|-----------------------------------|----------------------|----------------------|----------------------|--------------------------------|---------------------|-------------------------------|
|                                   | (1)                  | (2)                  | (3)                  | (4)                            | (5)                 | (6)                           |
| Income tax revenue                | -0.409***<br>(0.052) | -0.175***<br>(0.044) | -0.439***<br>(0.054) | -0.224***<br>(0.046)           | -0.080<br>(0.172)   | 0.024<br>(0.138)              |
| W Income tax revenue              | 0.440***<br>(0.056)  | -0.101*<br>(0.051)   | 0.466***<br>(0.061)  | -0.089 <sup>†</sup><br>(0.054) | 0.712***<br>(0.209) | -0.010<br>(0.177)             |
| Share foreigners (proxy)          |                      | 0.219***<br>(0.028)  |                      | 0.212***<br>(0.028)            |                     | 1.098***<br>(0.151)           |
| W Share foreigners (proxy)        |                      | -0.181***<br>(0.038) |                      | -0.172***<br>(0.039)           |                     | -0.412<br>(0.301)             |
| Trade tax revenue                 |                      | 0.240***<br>(0.026)  |                      | 0.217***<br>(0.028)            |                     | 0.702***<br>(0.087)           |
| W Trade tax revenue               |                      | 0.074<br>(0.060)     |                      | 0.046<br>(0.064)               |                     | 0.021<br>(0.194)              |
| Trade tax revenue <sup>2</sup>    |                      | -0.008***<br>(0.001) |                      | -0.007***<br>(0.001)           |                     | -0.063***<br>(0.010)          |
| W Trade tax revenue <sup>2</sup>  |                      | -0.003<br>(0.003)    |                      | -0.002<br>(0.003)              |                     | 0.027<br>(0.023)              |
| Share 65 and older                |                      | -0.215***<br>(0.024) |                      | -0.276***<br>(0.027)           |                     | -0.131**<br>(0.049)           |
| W Share 65 and older              |                      | 0.150***<br>(0.035)  |                      | 0.255***<br>(0.041)            |                     | 0.024<br>(0.070)              |
| Share 18 and younger              |                      | -0.217***<br>(0.030) |                      | -0.246***<br>(0.033)           |                     | -0.232***<br>(0.070)          |
| W Share 18 and younger            |                      | 0.225***<br>(0.040)  |                      | 0.283***<br>(0.047)            |                     | 0.043<br>(0.094)              |
| Population density                |                      | 0.326***<br>(0.031)  |                      | 0.321***<br>(0.035)            |                     | 0.120 <sup>†</sup><br>(0.068) |
| W Population density              |                      | 0.115**<br>(0.044)   |                      | 0.159***<br>(0.048)            |                     | 0.309**<br>(0.117)            |
| Population density <sup>2</sup>   |                      | 0.063***<br>(0.005)  |                      | 0.044***<br>(0.005)            |                     | 0.168***<br>(0.011)           |
| W Population density <sup>2</sup> |                      | -0.058***<br>(0.006) |                      | -0.053***<br>(0.007)           |                     | -0.104***<br>(0.016)          |
| R <sup>2</sup>                    | 0.014                | 0.384                | 0.019                | 0.387                          | 0.025               | 0.558                         |
| Adj. R <sup>2</sup>               | 0.014                | 0.382                | 0.019                | 0.384                          | 0.023               | 0.550                         |
| Num. obs.                         | 4455                 | 4455                 | 3486                 | 3486                           | 969                 | 969                           |

\*\*\* $p < 0.001$ , \*\* $p < 0.01$ , \* $p < 0.05$ , <sup>†</sup> $p < 0.1$ . Standardized coefficients. Standard errors in parentheses. W is the spatially lagged coefficient.

**Table S7.11.** Fixed effects individual slopes (FEIS) estimator. Dep. var.: Number of industrial facilities

|                                     | Overall                        | West              | East                           |
|-------------------------------------|--------------------------------|-------------------|--------------------------------|
|                                     | (1)                            | (2)               | (3)                            |
| Income tax revenue <sub>t-1</sub>   | -0.012 <sup>†</sup><br>(0.007) | -0.009<br>(0.006) | -0.024<br>(0.029)              |
| W Income tax revenue <sub>t-1</sub> | 0.018 <sup>†</sup><br>(0.009)  | 0.011<br>(0.009)  | 0.092<br>(0.063)               |
| Share foreigners (proxy)            | 0.003 <sup>†</sup><br>(0.001)  | 0.001<br>(0.001)  | 0.017<br>(0.011)               |
| W Share foreigners (proxy)          | -0.000<br>(0.003)              | 0.000<br>(0.003)  | -0.014<br>(0.017)              |
| Share 65 and older                  | -0.005<br>(0.003)              | -0.001<br>(0.003) | -0.022 <sup>†</sup><br>(0.012) |
| W Share 65 and older                | -0.007<br>(0.009)              | -0.005<br>(0.008) | -0.001<br>(0.026)              |
| Share 18 and younger                | 0.005 <sup>†</sup><br>(0.003)  | 0.002<br>(0.003)  | 0.015<br>(0.012)               |
| W Share 18 and younger              | 0.005<br>(0.004)               | -0.002<br>(0.006) | 0.051*<br>(0.026)              |
| Population density                  | 0.153<br>(0.117)               | 0.186<br>(0.120)  | 0.053<br>(0.440)               |
| W Population density                | -0.135<br>(0.100)              | -0.112<br>(0.091) | -0.323<br>(0.413)              |
| Population density <sup>2</sup>     | -0.019<br>(0.017)              | -0.025<br>(0.020) | 0.009<br>(0.028)               |
| W Population density <sup>2</sup>   | 0.002<br>(0.006)               | 0.003<br>(0.006)  | 0.004<br>(0.019)               |
| R <sup>2</sup>                      | 0.015                          | 0.015             | 0.028                          |
| Adj. R <sup>2</sup>                 | 0.015                          | 0.014             | 0.026                          |
| Num. obs.                           | 40095                          | 31374             | 8721                           |
| Num. groups: id                     | 4455                           | 3486              | 969                            |

\*\*\* $p < 0.001$ , \*\* $p < 0.01$ , \* $p < 0.05$ , <sup>†</sup> $p < 0.1$ . Standardized coefficients. Cluster robust standard errors in parentheses. W is the spatially lagged coefficient. Controls omitted: year dummies. Slopes for FEIS: trade tax revenue per capita, trade tax revenue per capita<sup>2</sup>.

**Table S7.12.** Fixed effects individual slopes (FEIS) estimator Dep. var.: Income tax revenue

|                                           | Overall              | West                 | East                 | Overall              | West                | East                 |
|-------------------------------------------|----------------------|----------------------|----------------------|----------------------|---------------------|----------------------|
|                                           | (1)                  | (2)                  | (3)                  | (4)                  | (5)                 | (6)                  |
| Number facilities <sub><i>t</i>-1</sub>   | -0.052**<br>(0.020)  | -0.080**<br>(0.026)  | 0.006<br>(0.015)     |                      |                     |                      |
| W Number facilities <sub><i>t</i>-1</sub> | 0.047<br>(0.044)     | -0.033<br>(0.063)    | 0.213***<br>(0.046)  |                      |                     |                      |
| Relative rank <sub><i>t</i>-1</sub>       |                      |                      |                      | -0.027*<br>(0.011)   | -0.031*<br>(0.015)  | -0.010<br>(0.009)    |
| Share foreigners (proxy)                  | -0.000<br>(0.009)    | -0.002<br>(0.009)    | -0.049***<br>(0.011) | 0.026***<br>(0.008)  | 0.005<br>(0.009)    | -0.034**<br>(0.012)  |
| W Share foreigners (proxy)                | 0.084***<br>(0.015)  | 0.047**<br>(0.017)   | 0.066***<br>(0.019)  |                      |                     |                      |
| Share 65 and older                        | 0.073***<br>(0.014)  | 0.075***<br>(0.019)  | 0.110***<br>(0.016)  | 0.072***<br>(0.013)  | 0.078***<br>(0.020) | 0.114***<br>(0.017)  |
| W Share 65 and older                      | -0.038<br>(0.025)    | -0.036<br>(0.031)    | 0.020<br>(0.028)     |                      |                     |                      |
| Share 18 and younger                      | -0.045***<br>(0.010) | -0.031*<br>(0.014)   | 0.022<br>(0.016)     | -0.071***<br>(0.008) | -0.018<br>(0.015)   | 0.013<br>(0.018)     |
| W Share 18 and younger                    | -0.008<br>(0.012)    | 0.076***<br>(0.020)  | 0.068***<br>(0.018)  |                      |                     |                      |
| Population density                        | -0.647***<br>(0.170) | -0.962***<br>(0.195) | 0.582***<br>(0.150)  | 0.484**<br>(0.158)   | -0.040<br>(0.173)   | 1.502***<br>(0.208)  |
| W Population density                      | 2.205***<br>(0.290)  | 2.009***<br>(0.331)  | 1.937***<br>(0.336)  |                      |                     |                      |
| Population density <sup>2</sup>           | 0.042**<br>(0.014)   | 0.062***<br>(0.015)  | -0.032**<br>(0.012)  | -0.007<br>(0.016)    | 0.030†<br>(0.015)   | -0.070***<br>(0.016) |
| W Population density <sup>2</sup>         | -0.069*<br>(0.031)   | -0.062†<br>(0.035)   | -0.049*<br>(0.021)   |                      |                     |                      |
| R <sup>2</sup>                            | 0.736                | 0.716                | 0.942                | 0.729                | 0.710               | 0.933                |
| Adj. R <sup>2</sup>                       | 0.736                | 0.716                | 0.942                | 0.729                | 0.710               | 0.933                |
| Num. obs.                                 | 40095                | 31374                | 8721                 | 40095                | 31374               | 8721                 |
| Num. groups: id                           | 4455                 | 3486                 | 969                  | 4455                 | 3486                | 969                  |

\*\*\* $p < 0.001$ , \*\* $p < 0.01$ , \* $p < 0.05$ , † $p < 0.1$ . Standardized coefficients. Cluster robust standard errors in parentheses. W is the spatially lagged coefficient. Controls omitted: year dummies. Slopes for FEIS: trade tax revenue per capita, trade tax revenue per capita<sup>2</sup>.



## References

- European Commission. (2006). *Guidance Document for the Implementation of the European PRTR*. Retrieved 02.05.2016, from [http://prtr.ec.europa.eu/docs/en\\_prtr.pdf](http://prtr.ec.europa.eu/docs/en_prtr.pdf)
- Meinel, G. (2011). Advanced Procedure for the Monitoring of Settlement and Open Space Development on Basis of Topographical Geodata Sets in the IOER-Monitor. *ISPRS - International Archives of the Photogrammetry, Remote Sensing and Spatial Information Sciences*, XXXVIII-4/W25, 104–109.
